# Supplementary material for: Variation Among Spring Wheat (Triticum aestivum L.) Genotypes in Response to the Drought Stress. II—Root System Structure
Source: PubMed Central journal article supplement (PMC6963452; doi:10.3390/plants8120584), 2019-12-08
Supplement: plants-08-00584-s001.pdf [file plants-08-00584-s001.pdf]

# Supplementary

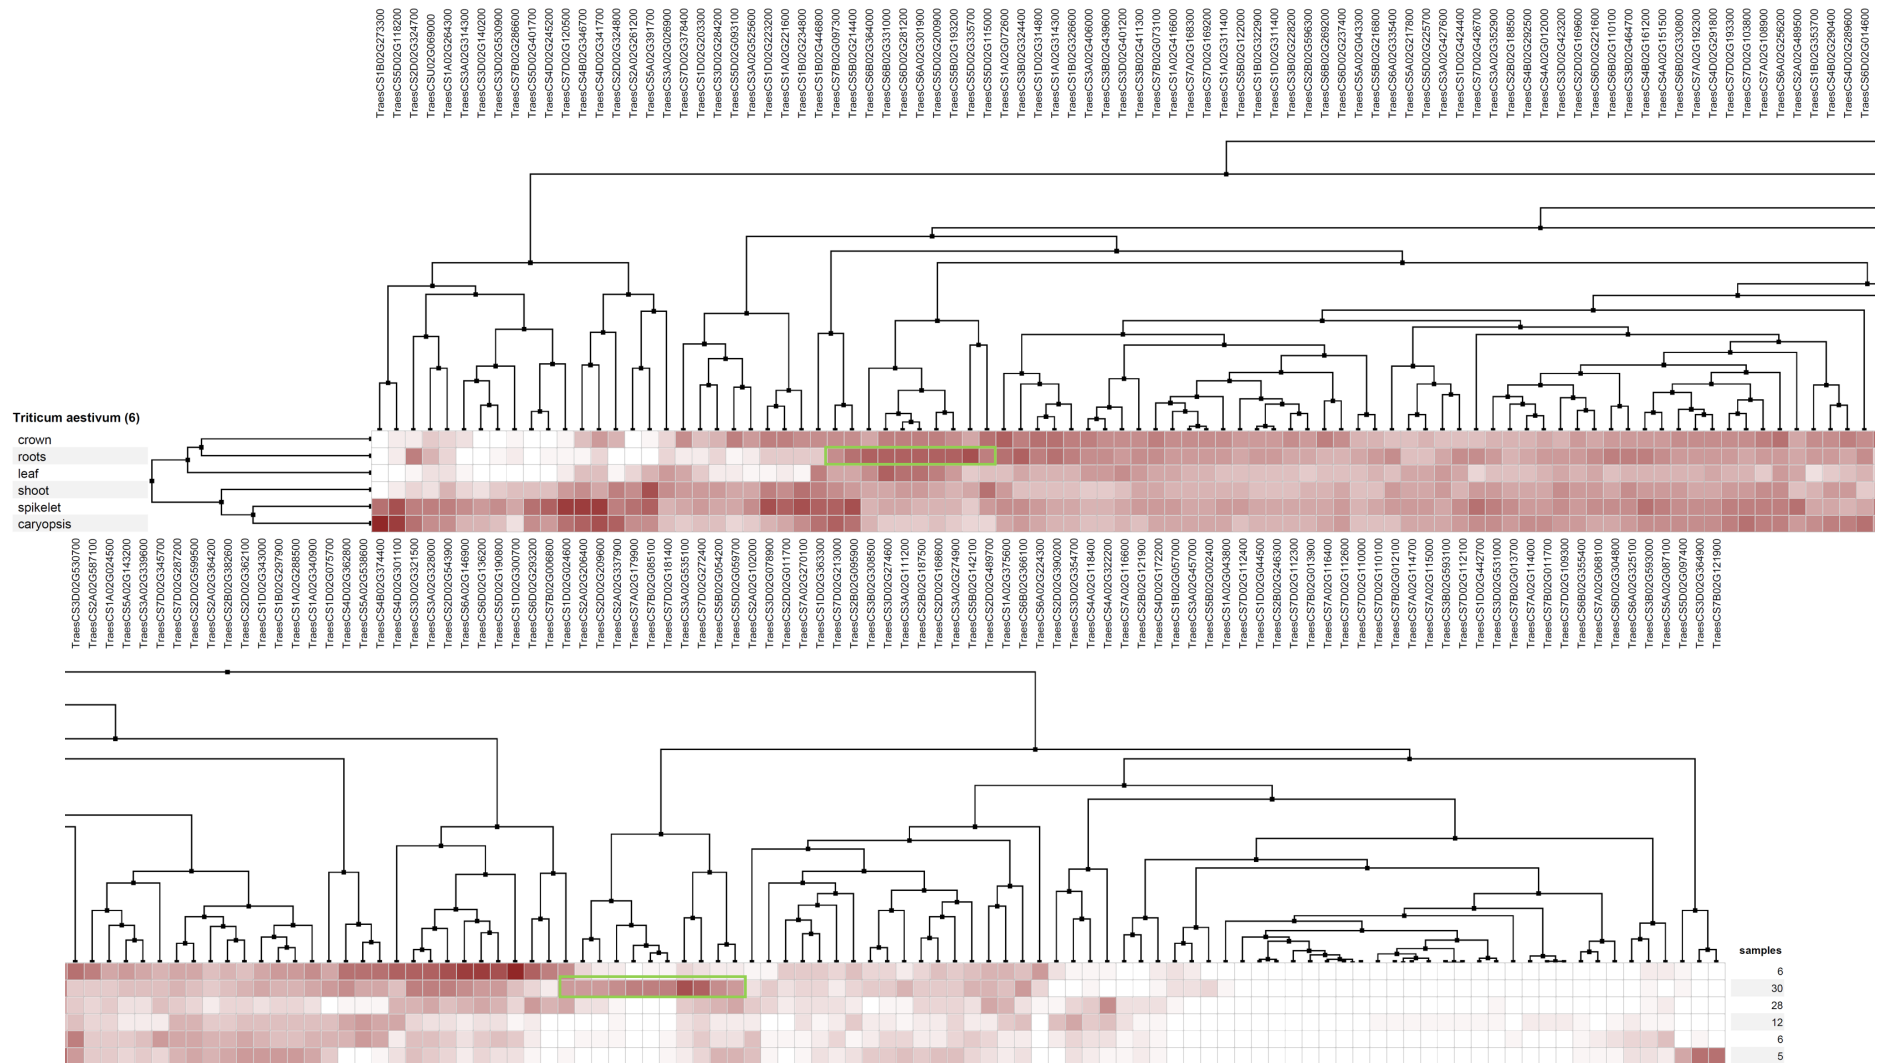

**Figure S1.** Transcription factors (187 genes). Transcripts were analyzed on the platform TA\_mRNASeq\_WHEAT\_GL-1. Percentage of expression potential: 0, 20, 40, 60, 80, 100. Green boxes indicate selected genes described in Table 6.

**A**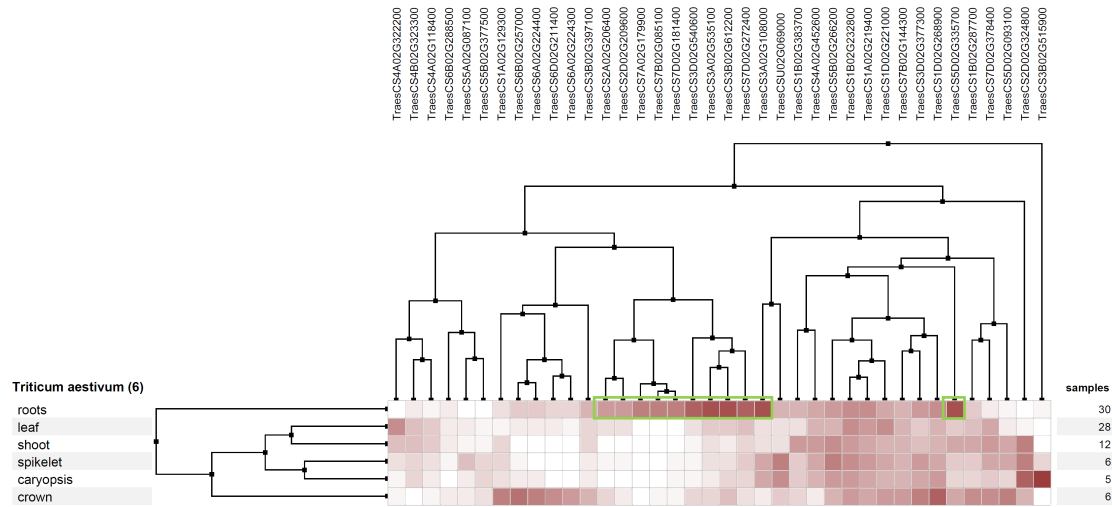**B**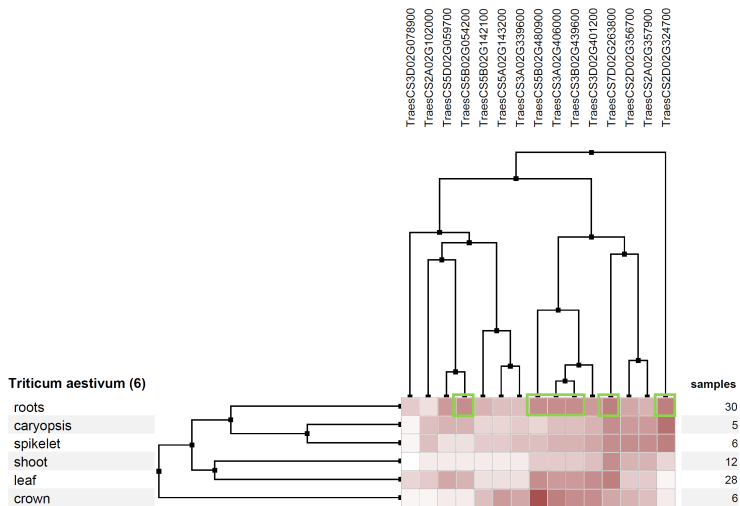**C**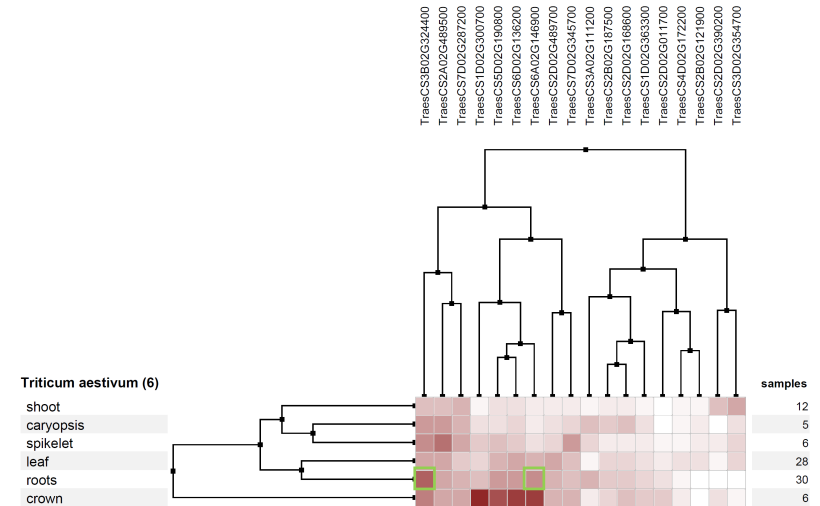

**Figure S2.** MYB (A, 38genes), NAC (B, 15 genes), and WRKY (C, 18 genes) transcription factors. Transcripts were analyzed on the platform TA\_mRNASeq\_WHEAT\_GL-1. Percentage of expression potential: 0, 20, 40, 60, 80, 100. Green boxes indicate selected genes described in Table 6.

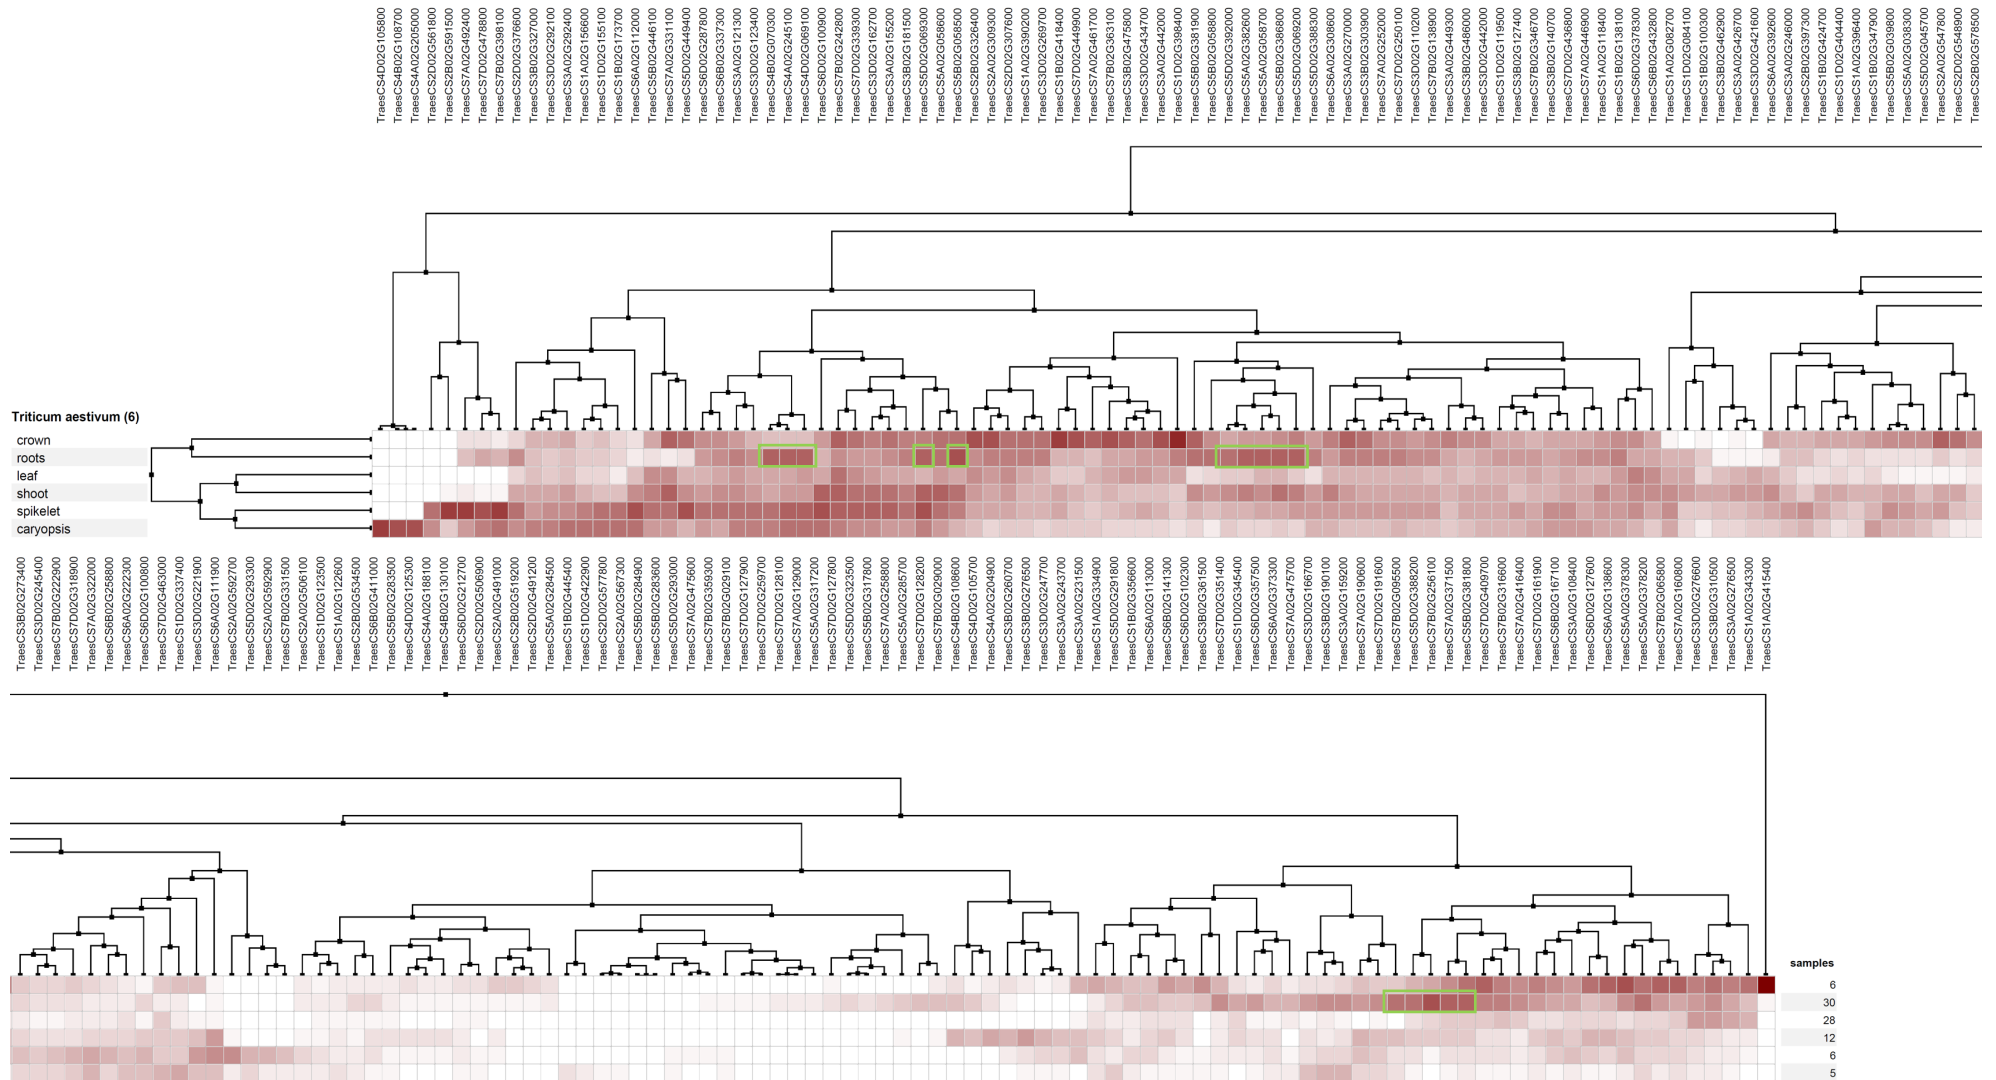

**Figure S3.** Auxins-related genes (195 genes). Transcripts were analyzed on the platform TA\_mRNASeq\_WHEAT\_GL-1. Percentage of expression potential: 0, 20, 40, 60, 80, 100. Green boxes indicate selected genes described in Table 6.

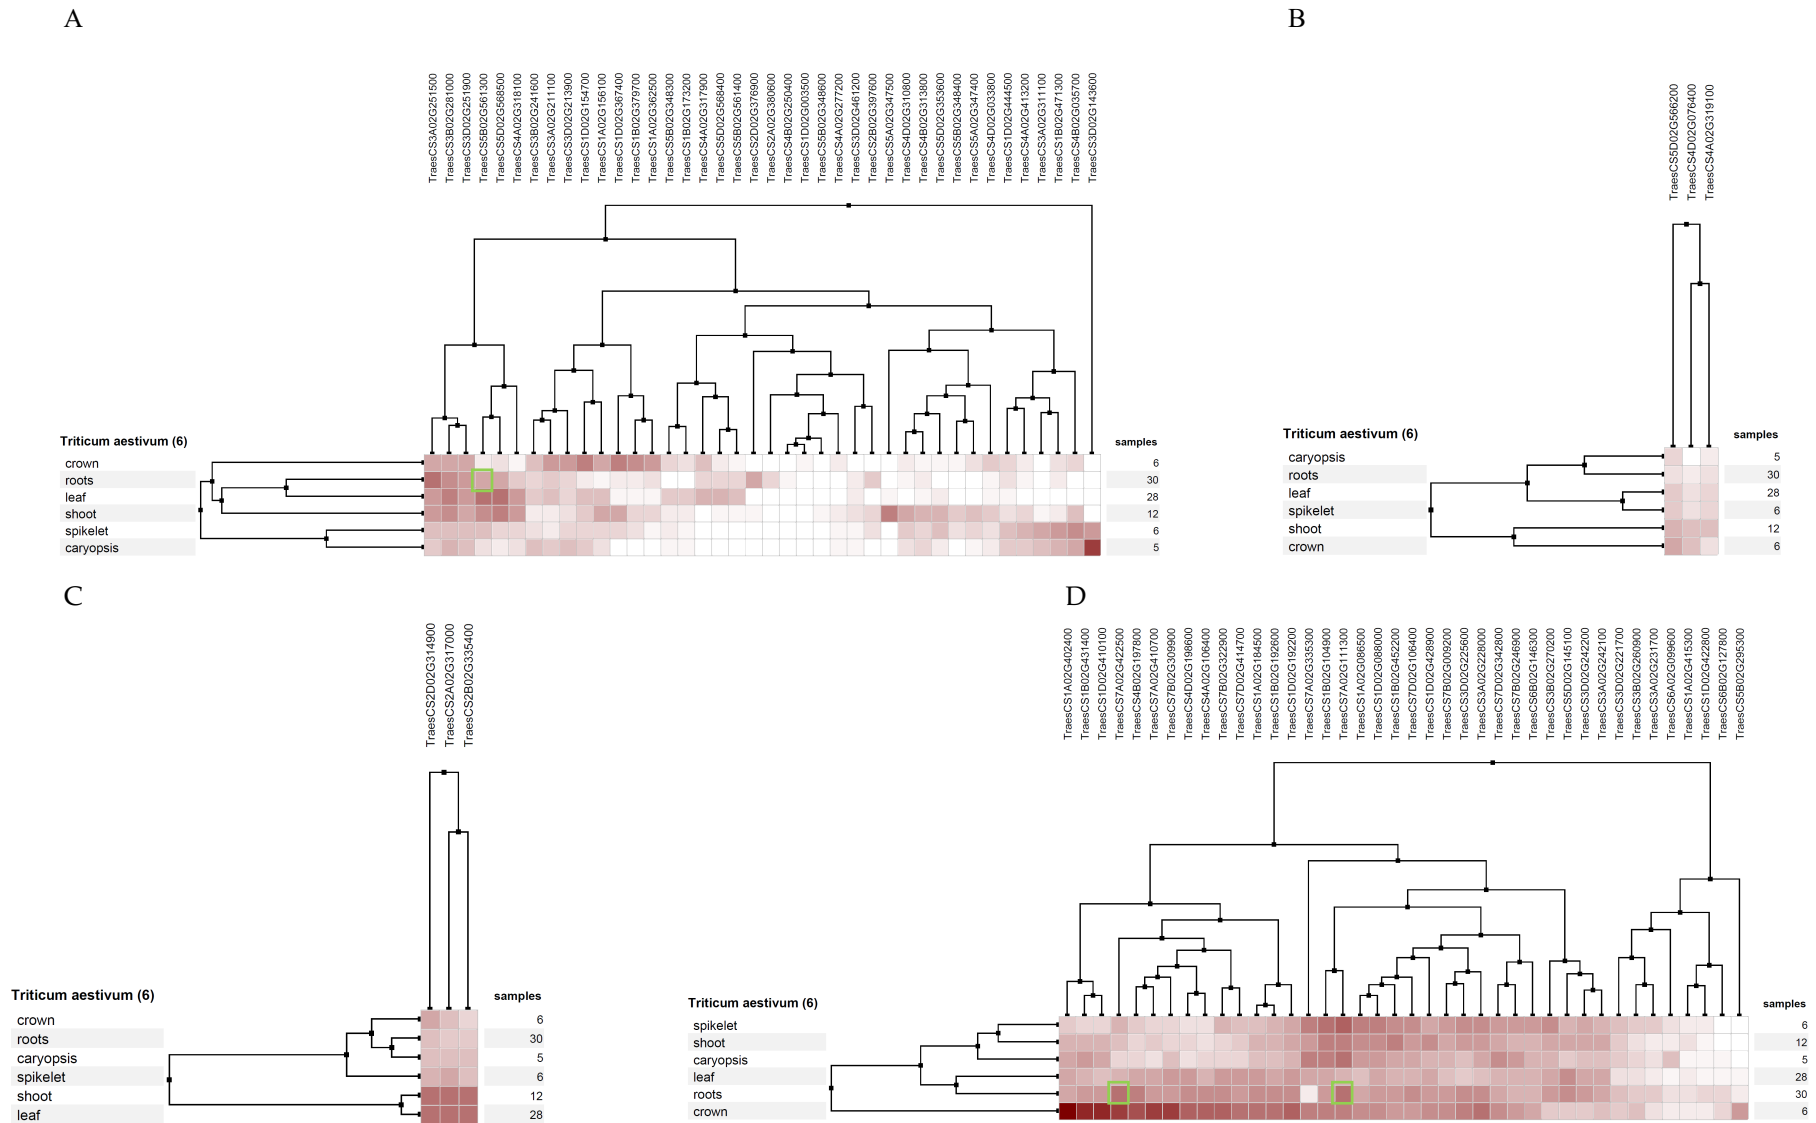

**Figure S4.** Cytokinin (A, 40 genes), gibberellin (B, 3 genes), zeatin epoxidase (C, 3 genes), mitogen-activated protein kinase (D, 40 genes) related genes. Transcripts were analyzed on the platform TA\_mRNASeq\_WHEAT\_GL-1. Percentage of expression potential: 0, 20, 40, 60, 80, 100. Green boxes indicate selected genes described in Table 6.

A

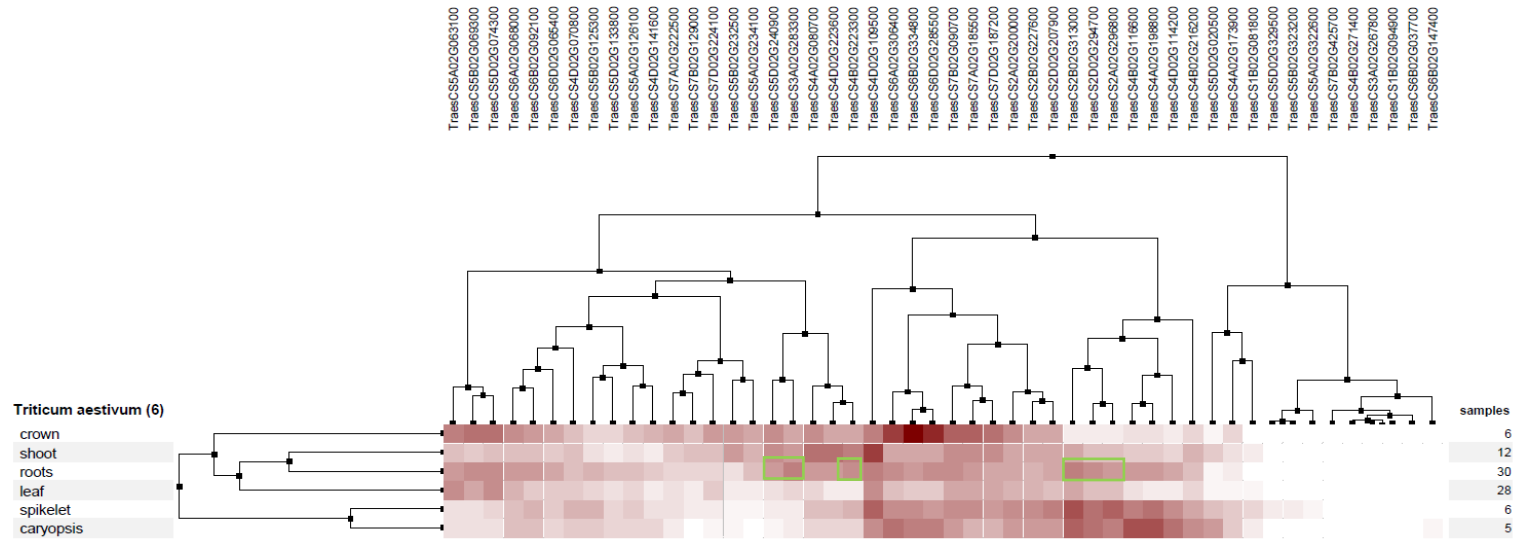

B

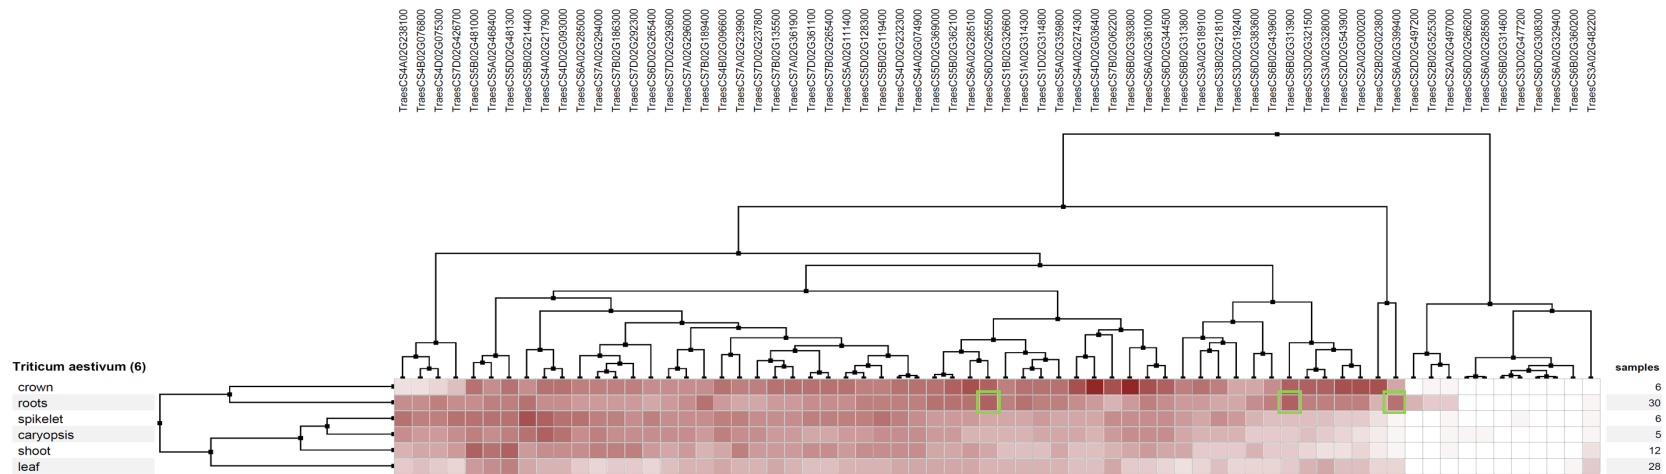

**Figure S5.** Abscisic acid (A, 50 genes), ethylene (B, 68 genes) related genes. Transcripts were analyzed on the platform TA\_mRNASeq\_WHEAT\_GL-1. Percentage of expression potential: 0, 20, 40, 60, 80, 100. Green boxes indicate selected genes described in Table 6.

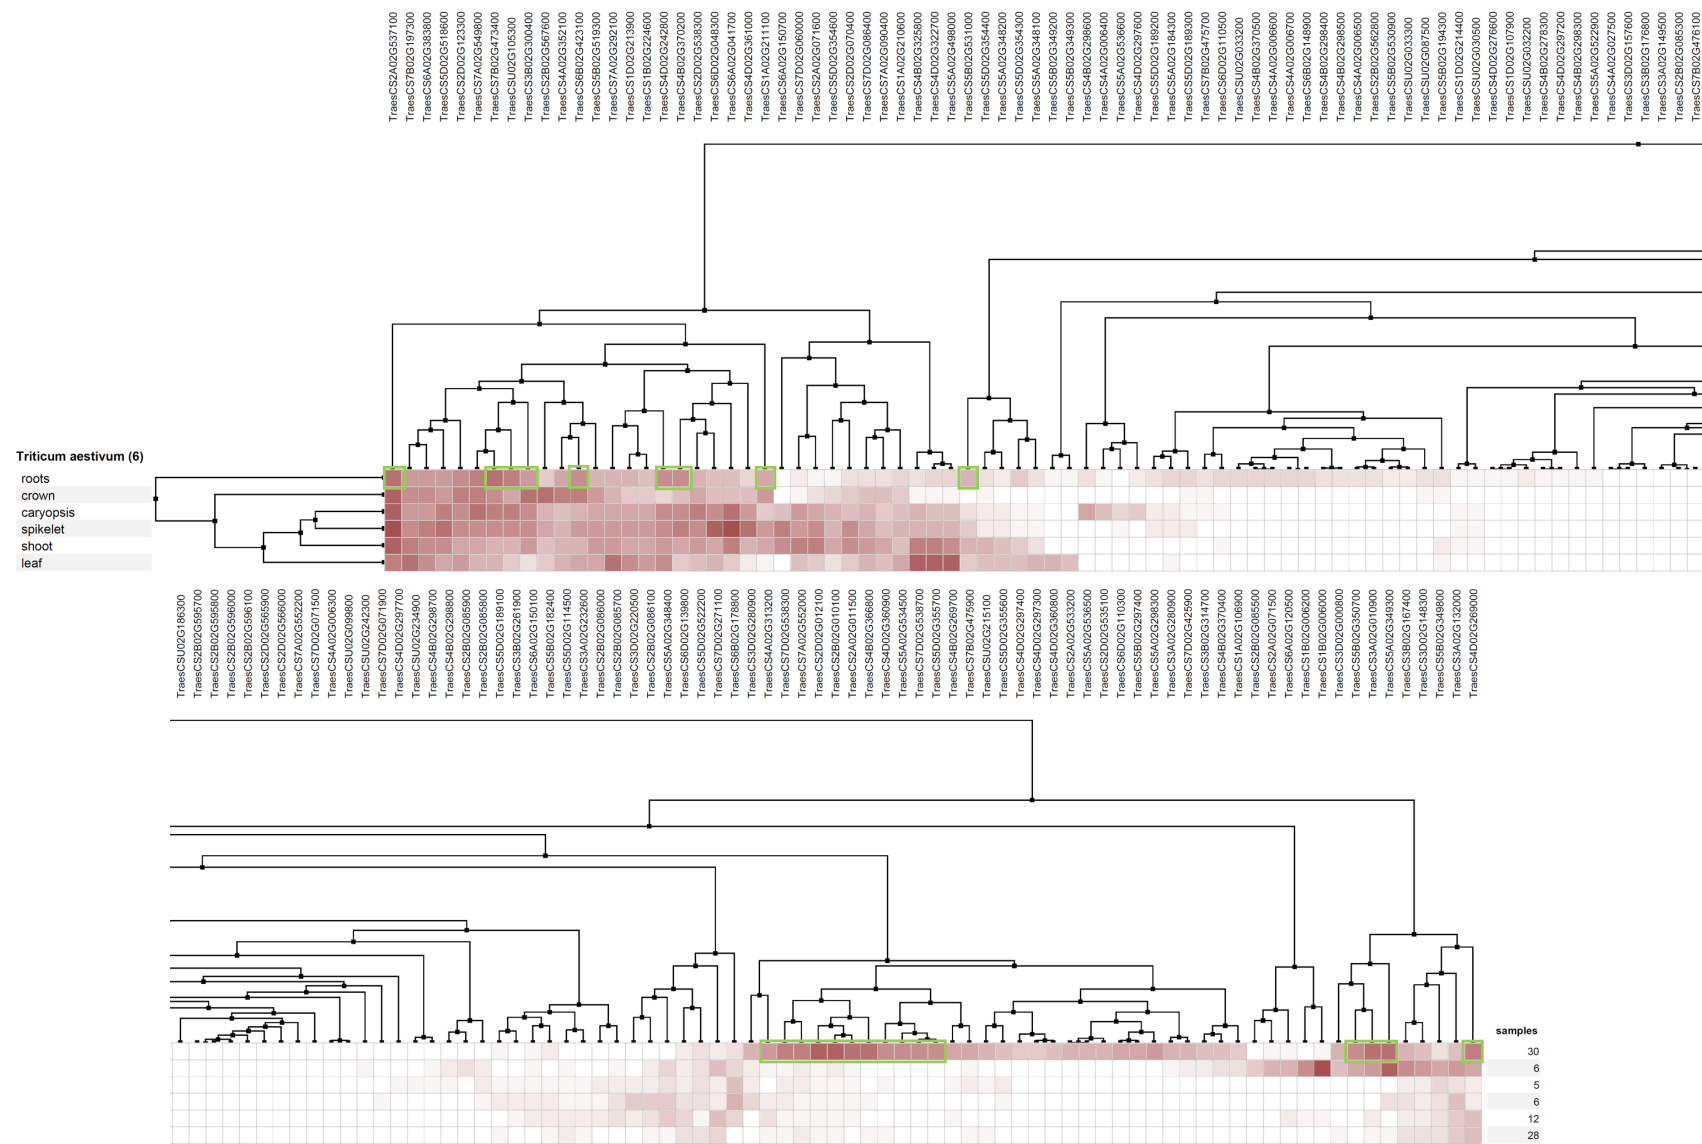

**Figure S6.** Antioxidative enzyme (156 genes) related genes. Transcripts were analyzed on the platform TA\_mRNASeq\_WHEAT\_GL-1. Percentage of expression potential: 0, 20, 40, 60, 80, 100. Green boxes indicate selected genes described in Table 6.

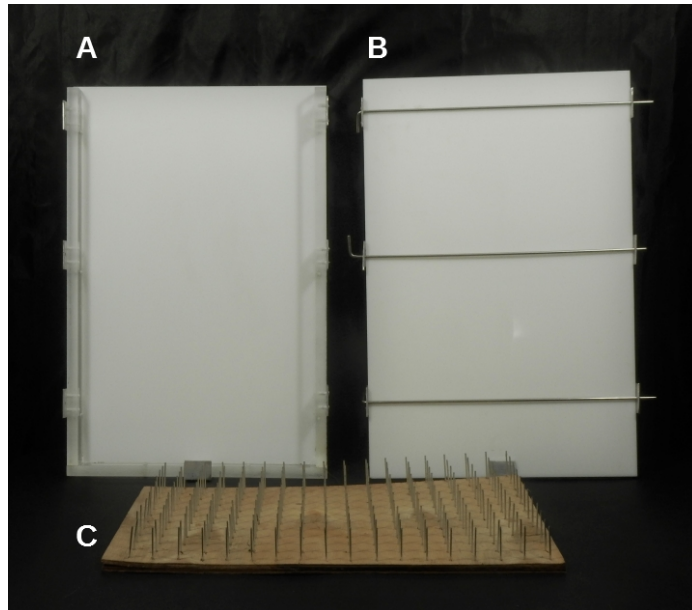

**Figure S7.** Root box-pin board set: open root-box (A); closed root-box (B); the pin-board (C).

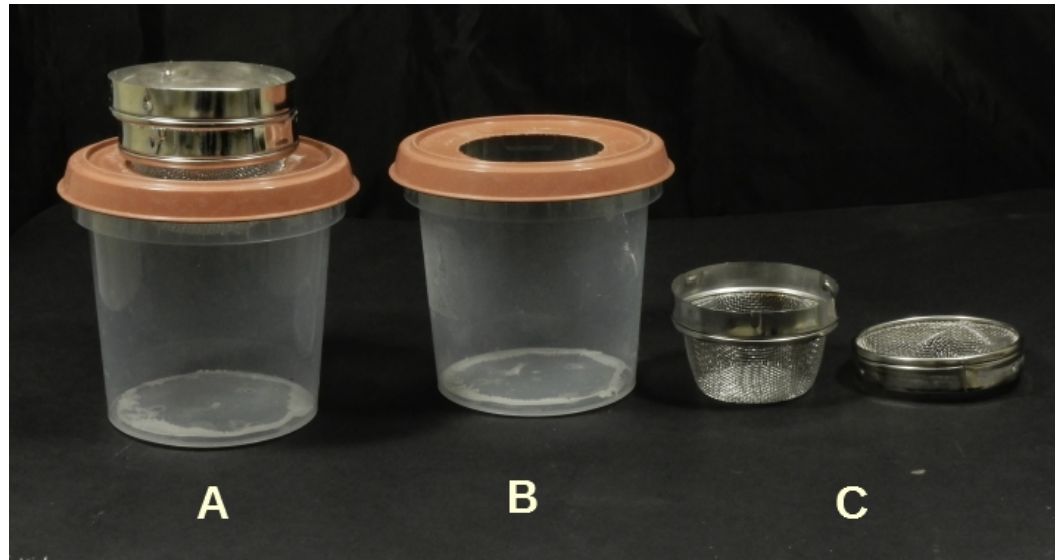

**Figure S8.** Root-basket set (A): pot with mounting plate (B); lower and upper basket (C).closed root-box (B); the pin-board (C).
